# Supplementary material for: How We Manage Bone Marrow Edema—An Interdisciplinary Approach
Source: PubMed Central journal article supplement (PMC7074543; doi:10.3390/jcm9020551), 2020-02-18
Supplement: jcm-09-00551-s001.pdf [file jcm-09-00551-s001.pdf]

Table.S1: Literature overview of molecular, immunological and histopathological findings in BME..

| Reference | Year      | Study Design                       | disease                                                                    | location                | <i>in vivo</i> /<br><i>in vitro</i> | species                         | gene/<br>molecule                            | increased/<br>decreased | treatment    | comment                                                                                                                               |
|-----------|-----------|------------------------------------|----------------------------------------------------------------------------|-------------------------|-------------------------------------|---------------------------------|----------------------------------------------|-------------------------|--------------|---------------------------------------------------------------------------------------------------------------------------------------|
| 1         | 2003      | Case report                        | Subchondral insufficiency fracture (SIF)                                   | Radiological, Histology | <i>in vivo</i>                      | Homo sapiens                    | n.a.                                         | n.a.                    | n.a.         | dense irregular, discontinued trabeculae                                                                                              |
| 2         | 2017      | Animal model                       | Bone marrow lesion                                                         | Radiological, Histology | <i>in vivo</i>                      | Oryctolagus cuniculus           | n.a.                                         | n.a.                    | n.a.         | Biomechanical BME induction and MRI                                                                                                   |
| 3         | 2018      | Cohort Study                       | Spondyloarthropathy                                                        | Serum                   | <i>in vivo</i>                      | Homo sapiens                    | GDF15                                        | increased               | n.a.         |                                                                                                                                       |
| 4         | 2019      | Interventional Study               | Spondyloarthropathy                                                        | Serum                   | <i>in vivo</i>                      | Homo sapiens                    | DKK1                                         | decreased               | TNF antibody |                                                                                                                                       |
| 5         | 2011      | Genetic animal model               | Spondyloarthropathy                                                        | Radiological, Histology | <i>in vivo</i>                      | Mus musculus                    | n.a.                                         | n.a.                    | n.a.         | Biomechanical BME induction and MRI, TNF is essential for the induction and maintenance of BME, increased vascularity and cellularity |
| 6         | 2010      | Genetic animal model               | Spondyloarthropathy                                                        | Radiological, Histology | <i>in vivo</i>                      | Mus musculus                    | n.a.                                         | n.a.                    | n.a.         | Biomechanical BME induction and MRI, no significant increase of BME in TNFtg mice, but sig. Increase of osteoclasts and vascularity   |
| 7         | 2013      | Cohort Study                       | Axial psoriatic arthritis, axial spondyloarthritis, ankylosing spondylitis | Serum                   | <i>in vivo</i>                      | Homo sapiens                    | HLA-B27                                      | increased               | n.a.         | HLA-B27 positive correlation to BME                                                                                                   |
| 8         | 2006      | Case series                        | Ankylosing spondylitis                                                     | Histology               | <i>in vivo</i>                      | Homo sapiens                    | CD3                                          | increased               | n.a.         | T cells                                                                                                                               |
|           |           |                                    |                                                                            |                         |                                     |                                 | CD4                                          | increased               |              | T cells                                                                                                                               |
|           |           |                                    |                                                                            |                         |                                     |                                 | CD8                                          | increased               |              | T cells                                                                                                                               |
|           |           |                                    |                                                                            |                         |                                     |                                 | CD20                                         | increased               |              | B cells                                                                                                                               |
|           |           |                                    |                                                                            |                         |                                     |                                 | CD34                                         | increased               |              | vessels                                                                                                                               |
| HLA-B27   | increased |                                    |                                                                            |                         |                                     |                                 |                                              |                         |              |                                                                                                                                       |
| 9         | 2012      | Cohort Study                       | Ankylosing spondylitis                                                     | Serum                   | <i>in vivo</i>                      | Homo sapiens                    | MMP3                                         | increased               | n.a.         |                                                                                                                                       |
| 10        | 2017      | Cohort Study                       | Undifferentiated arthritis                                                 | Serum, Synovia          | <i>in vivo</i>                      | Homo sapiens                    | Galectin-3<br>PIIANP                         | increased<br>decreased  | n.a.         |                                                                                                                                       |
| 11        | 2016      | Case series                        | Rheumatoid arthritis                                                       | Radiologic, Serum       | <i>in vivo</i>                      | homo sapiens                    | anti-citrullinated protein antibodies (ACPA) | increased               | n.a.         |                                                                                                                                       |
|           |           |                                    |                                                                            |                         |                                     |                                 | rheumatoid factor (RF)                       | increased               |              |                                                                                                                                       |
|           |           |                                    |                                                                            |                         |                                     |                                 | anti-carbamylated protein (anti-CarP)        | increased               |              |                                                                                                                                       |
| 12        | 2018      | Genetic animal model               | Rheumatoid arthritis                                                       | Histology               | <i>in vivo</i>                      | Mus musculus                    | CD3                                          | increased               | n.a.         | Tyro3/Axl/Mertk-deficient mice, T cells                                                                                               |
|           |           |                                    |                                                                            |                         |                                     |                                 | CD19                                         | increased               |              | B cells                                                                                                                               |
|           |           |                                    |                                                                            |                         |                                     |                                 | ADGRE1                                       | increased               |              | macrophages                                                                                                                           |
| 13        | 2007      | Genetic animal model, Human sample | Osteoarthritis                                                             | Radiological            | <i>in vivo</i>                      | Homo sapiens<br>Cavia porcellus | n.a.                                         | n.a.                    | n.a.         | Reduced tibia perfusion                                                                                                               |

|    |      |                      |                            |                                                               |                      |                        |                                                                                                                                                                                  |                                                                            |                   |                                                                                                                         |
|----|------|----------------------|----------------------------|---------------------------------------------------------------|----------------------|------------------------|----------------------------------------------------------------------------------------------------------------------------------------------------------------------------------|----------------------------------------------------------------------------|-------------------|-------------------------------------------------------------------------------------------------------------------------|
| 14 | 2005 | Animal model         | Osteoarthritis             | Radiological                                                  | <i>in vivo</i>       | Canis lupus familiaris | n.a.                                                                                                                                                                             | n.a.                                                                       | n.a.              |                                                                                                                         |
| 15 | 2008 | Case series          | Osteoarthritis             | Radiological, Histology                                       | <i>in vivo</i>       | Homo sapiens           | n.a.                                                                                                                                                                             | n.a.                                                                       | n.a.              | abnormal swollen adipocytes, healing micro-fractures, cyst formation, thickened subchondral plate/subchondral sclerosis |
| 16 | 2019 | Cohort study         | Osteoarthritis             | Radiological, Serum                                           | <i>in vivo</i>       | Homo sapiens           | RETN                                                                                                                                                                             | increased                                                                  | n.a.              |                                                                                                                         |
| 17 | 2019 | Cohort study         | Osteoarthritis             | Radiological, Histology                                       | <i>in vivo</i>       | Homo sapiens           | n.a.                                                                                                                                                                             | n.a.                                                                       | n.a.              | Bone morphology changes in the anterior-medial (AM) region                                                              |
| 18 | 2016 | Cohort study         | Osteoarthritis             | Radiological, Histology                                       | <i>in vivo</i>       | Homo sapiens           | vWF<br>CD31                                                                                                                                                                      | increased<br>increased                                                     | n.a.              | increased bone turnover, increased vascularity, reduced fat                                                             |
| 19 | 2019 | Animal model         | Osteoarthritis             | Radiological, Synovia, Histology, <i>In vitro</i> experiments | <i>in vivo</i>       | Mus musculus           | CD11b<br>TRAP<br>CD254                                                                                                                                                           | increased<br>increased<br>increased                                        | n.a.              | collagen-AB induced OA, decrease of trabecula, increase of B/T cells                                                    |
| 20 | 2019 | Interventional study | Osteoarthritis             | Radiological                                                  | <i>in vivo</i>       | Homo sapiens           | n.a.                                                                                                                                                                             | n.a.                                                                       | vitamine D        | no effect                                                                                                               |
| 21 | 2014 | Interventional study | Osteoarthritis             | Radiological, Urine                                           | <i>in vivo</i>       | Homo sapiens           | n.a.                                                                                                                                                                             | n.a.                                                                       | glucosamine       | no treatment benefit                                                                                                    |
| 22 | 2004 | Case series          | Chondroblastoma            | Radiological, Histology                                       | <i>in vivo</i>       | Homo sapiens           | Cyclooxygenase-2                                                                                                                                                                 | increased                                                                  | n.a.              |                                                                                                                         |
| 23 | 2008 | Animal model         | Avascular necrosis         | Radiological, Histology                                       | <i>in vivo</i>       | Oryctolagus cuniculus  | VEGF                                                                                                                                                                             | decreased                                                                  | n.a.              | corticosteroid injection, reduced bone                                                                                  |
| 24 | 2008 | Case series          | Osteonecrosis              | Serum                                                         | <i>in vivo</i>       | Homo sapiens           | Kininogen variant 1<br>Complement factor C3 precursor<br>Complement factor H<br>Apolipoprotein A-IV precursor<br>Antithrombin III chain B<br>Gelsolin isoform $\alpha$ precursor | increased<br>increased<br>increased<br>decreased<br>decreased<br>decreased | n.a.              |                                                                                                                         |
| 25 | 2018 | Cohort study         | Avascular necrosis         | Serum                                                         | <i>in vivo</i>       | Homo sapiens           | TNF<br>IL6                                                                                                                                                                       | decreased<br>decreased                                                     | hyperbaric oxygen |                                                                                                                         |
| 26 | 2009 | Case Report          | Hypophosphatasia           | Radiological, Histology                                       | <i>in vivo</i>       | Homo sapiens           | ALPL                                                                                                                                                                             | SNP                                                                        | n.a.              | bone necrosis, marrow fibrosis                                                                                          |
| 27 | 2011 | Case Report          | Hypophosphatasia           | Radiological, <i>in vitro</i> assays                          | <i>in vivo/vitro</i> | Homo sapiens           | ALPL                                                                                                                                                                             | SNP                                                                        | n.a.              |                                                                                                                         |
| 28 | 2003 | Cohort study         | Bone marrow edema syndrome | Radiological, Histology, Serum                                | <i>in vivo</i>       | Homo sapiens           | osteocalcin<br>bone ALP<br>C-terminal cross-linking telopeptide<br>PIIANP                                                                                                        | increased<br>increased<br>increased<br>increased                           | n.a.              | mean bone-to-serum ratio                                                                                                |
| 29 | 2017 | Case series          | Bone marrow edema syndrome | Radiological, Serum                                           | <i>in vivo</i>       | Homo sapiens           | 25(OH)D                                                                                                                                                                          | decreased                                                                  | n.a.              |                                                                                                                         |

|    |      |                       |                                   |                     |                |              |                                                                                                                                                                                                              |                                                               |          |                                |
|----|------|-----------------------|-----------------------------------|---------------------|----------------|--------------|--------------------------------------------------------------------------------------------------------------------------------------------------------------------------------------------------------------|---------------------------------------------------------------|----------|--------------------------------|
| 30 | 2002 | Case series           | Bone marrow edema syndrome        | Radiological, Serum | <i>in vivo</i> | Homo sapiens | lipoprotein (a)<br>ApoA1<br>ApoB                                                                                                                                                                             | decreased<br>increased<br>increased                           | n.a.     |                                |
| 31 | 2000 | Case series           | Bone marrow edema syndrome        | Serum               | <i>in vivo</i> | Homo sapiens | lipoprotein (a)                                                                                                                                                                                              | increased                                                     | n.a.     |                                |
| 32 | 2007 | Case report           | Regional transient osteoporosis   | Radiological        | <i>in vivo</i> | Homo sapiens | vitamin C                                                                                                                                                                                                    | decreased                                                     | n.a.     | no reduced perfusion           |
| 33 | 2019 | Cross-Sectional study | Bone marrow edema syndrome        | Radiological, Serum | <i>in vivo</i> | Homo sapiens | bone-alkaline phosphatase (BAP)<br>type I procollagen N-terminal propeptide (PINP)<br>cross-linked N-telopeptide of type I collagen (NTx)<br>tartrateresistant acid phosphatase-5b (TRACP-5b)<br>pentosidine | increased<br>increased<br>increased<br>increased<br>increased | n.a.     | decreased bone mineral density |
| 34 | 2013 | Case series           | Bone marrow edema syndrome        | Radiological, Serum | <i>in vivo</i> | Homo sapiens | lipoprotein (a)<br>ApoA1<br>ApoB                                                                                                                                                                             | increased<br>Increased<br>increased                           | iloprost |                                |
| 35 | 2005 | Case series           | hydroxyapatite deposition disease | Radiological        | <i>in vivo</i> | Homo sapiens | n.a.                                                                                                                                                                                                         | n.a.                                                          | n.a.     | underlying the enthesis        |

n.a.: not applicable

## References

1. Uetani, M.; Hashmi, R.; Ito, M.; Okimoto, T.; Kawahara, Y.; Hayashi, K.; Enomoto, H.; Shindo, H. Subchondral insufficiency fracture of the femoral head: magnetic resonance imaging findings correlated with micro-computed tomography and histopathology. *J. Comput. Assist. Tomogr.* 2003, *27*, 189–193.
2. Matheny, J.B.; Goff, M.G.; Pownder, S.L.; Koff, M.F.; Hayashi, K.; Yang, X.; Bostrom, M.P.G.; van der Meulen, M.C.H.; Hernandez, C.J. An *in vivo* model of a mechanically-induced bone marrow lesion. *J. Biomech.* 2017, *64*, 258–261.
3. Song, Y.; Cui, Y.; Zhang, X.; Lin, H.; Zhang, G.; Zeng, H.; Zeng, Y. Increased serum levels of MIC1/GDF15 correlated with bone erosion in spondyloarthritis: A pilot study. *Medicine (Baltimore)*. 2018, *97*, e13733.
4. Zhao, Z.; Wang, G.; Wang, Y.; Yang, J.; Wang, Y.; Zhu, J.; Huang, F. Correlation between magnetic resonance imaging (MRI) findings and the new bone formation factor Dkk-1 in patients with spondyloarthritis. *Clin. Rheumatol.* 2019, *38*, 465–475.
5. Papuga, M.O.; Kwok, E.; You, Z.; Rubery, P.T.; Dougherty, P.E.; Pryhuber, G.; Beck, C.A.; Hilton, M.J.; Awad, H.A.; Schwarz, E.M. TNF is required for the induction but not the maintenance of compression-induced BME signals in murine tail vertebrae: limitations of anti-TNF therapy for degenerative disc disease. *J. Orthop. Res.* 2011, *29*, 1367–1374.
6. Papuga, M.O.; Proulx, S.T.; Kwok, E.; You, Z.; Rubery, P.T.; Dougherty, P.E.; Hilton, M.J.; Awad, H.A.; Schwarz, E.M. Chronic axial compression of the mouse tail segment induces MRI bone marrow edema changes that correlate with increased marrow vasculature and cellularity. *J. Orthop. Res.* 2010, *28*, 1220–1228.
7. Castillo-Gallego, C.; Aydin, S.Z.; Emery, P.; McGonagle, D.G.; Marzo-Ortega, H. Magnetic resonance imaging assessment of axial psoriatic arthritis: extent of disease relates to HLA-B27. *Arthritis Rheum.* 2013, *65*, 2274–2278.

8. Appel, H.; Loddenkemper, C.; Grozdanovic, Z.; Ebhardt, H.; Dreimann, M.; Hempfing, A.; Stein, H.; Metz-Stavenhagen, P.; Rudwaleit, M.; Sieper, J. Correlation of histopathological findings and magnetic resonance imaging in the spine of patients with ankylosing spondylitis. *Arthritis Res. Ther.* 2006, 8, R143.
9. Soliman, E.; Labib, W.; el-Tantawi, G.; Hamimy, A.; Alhadidy, A.; Aldawoudy, A. Role of matrix metalloproteinase-3 (MMP-3) and magnetic resonance imaging of sacroiliitis in assessing disease activity in ankylosing spondylitis. *Rheumatol. Int.* 2012, 32, 1711–1720.
10. Issa, S.F.; Duer, A.; Ostergaard, M.; Horslev-Petersen, K.; Hetland, M.L.; Hansen, M.S.; Junker, K.; Lindegaard, H.M.; Moller, J.M.; Junker, P. Increased galectin-3 may serve as a serologic signature of pre-rheumatoid arthritis while markers of synovitis and cartilage do not differ between early undifferentiated arthritis subsets. *Arthritis Res. Ther.* 2017, 19, 80.
11. Boeters, D.M.; Nieuwenhuis, W.P.; Verheul, M.K.; Newsum, E.C.; Reijniere, M.; Toes, R.E.M.; Trouw, L.A.; van der Helm-van Mil, A.H.M. MRI-detected osteitis is not associated with the presence or level of ACPA alone, but with the combined presence of ACPA and RF. *Arthritis Res. Ther.* 2016, 18, 179.
12. Waterborg, C.E.J.; Koenders, M.I.; van Lent, P.L.E.M.; van der Kraan, P.M.; van de Loo, F.A.J. Tyro3/Axl/Mertk-deficient mice develop bone marrow edema which is an early pathological marker in rheumatoid arthritis. *PLoS One* 2018, 13, e0205902.
13. Aaron, R.K.; Dyke, J.P.; Ciombor, D.M.; Ballon, D.; Lee, J.; Jung, E.; Tung, G.A. Perfusion abnormalities in subchondral bone associated with marrow edema, osteoarthritis, and avascular necrosis. *Ann. N. Y. Acad. Sci.* 2007, 1117, 124–137.
14. Libicher, M.; Ivancic, M.; Hoffmann, M.; Wenz, W. Early changes in experimental osteoarthritis using the Pond-Nuki dog model: technical procedure and initial results of in vivo MR imaging. *Eur. Radiol.* 2005, 15, 390–394.
15. Taljanovic, M.S.; Graham, A.R.; Benjamin, J.B.; Gmitro, A.F.; Krupinski, E.A.; Schwartz, S.A.; Hunter, T.B.; Resnick, D.L. Bone marrow edema pattern in advanced hip osteoarthritis: quantitative assessment with magnetic resonance imaging and correlation with clinical examination, radiographic findings, and histopathology. *Skeletal Radiol.* 2008, 37, 423–431.
16. Han, W.; Aitken, D.; Zheng, S.; Wang, B.; Wluka, A.E.; Zhu, Z.; Blizzard, L.; Wang, X.; Winzenberg, T.; Cicuttini, F.; et al. Higher Serum Levels of Resistin Are Associated With Knee Synovitis and Structural Abnormalities in Patients With Symptomatic Knee Osteoarthritis. *J. Am. Med. Dir. Assoc.* 2019.
17. Muratovic, D.; Findlay, D.M.; Cicuttini, F.M.; Wluka, A.E.; Lee, Y.R.; Edwards, S.; Kuliwaba, J.S. Bone marrow lesions in knee osteoarthritis: regional differences in tibial subchondral bone microstructure and their association with cartilage degeneration. *Osteoarthr. Cartil.* 2019.
18. Shabestari, M.; Vik, J.; Reseland, J.E.; Eriksen, E.F. Bone marrow lesions in hip osteoarthritis are characterized by increased bone turnover and enhanced angiogenesis. *Osteoarthr. Cartil.* 2016, 24, 1745–1752.
19. Wang, F.; Luo, A.; Xuan, W.; Qi, L.; Wu, Q.; Gan, K.; Zhang, Q.; Zhang, M.; Tan, W. The Bone Marrow Edema Links to an Osteoclastic Environment and Precedes Synovitis During the Development of Collagen Induced Arthritis. *Front. Immunol.* 2019, 10, 884.
20. Perry, T.A.; Parkes, M.J.; Hodgson, R.; Felson, D.T.; O'Neill, T.W.; Arden, N.K. Effect of Vitamin D supplementation on synovial tissue volume and subchondral bone marrow lesion volume in symptomatic knee osteoarthritis. *BMC Musculoskelet. Disord.* 2019, 20, 76.
21. Kwok, C.K.; Roemer, F.W.; Hannon, M.J.; Moore, C.E.; Jakicic, J.M.; Guermazi, A.; Green, S.M.; Evans, R.W.; Boudreau, R. Effect of oral glucosamine on joint structure in individuals with chronic knee pain: a randomized, placebo-controlled clinical trial. *Arthritis Rheumatol. (Hoboken, N.J.)* 2014, 66, 930–939.
22. Shinmura, K.; Ishida, T.; Goto, T.; Kuroda, M.; Hattori, H.; Nagai, S.; Imamura, T.; Mukai, K.; Imakiire, A. Expression of cyclooxygenase-2 in chondroblastoma: immunohistochemical analysis with special emphasis on local inflammatory reaction. *Virchows Arch.* 2004, 444, 28–35.
23. Wen, Q.; Ma, L.; Chen, Y.-P.; Yang, L.; Luo, W.; Wang, X.-N. A rabbit model of hormone-induced early avascular necrosis of the femoral head. *Biomed. Environ. Sci.* 2008, 21, 398–403.
24. Wu, R.-W.; Wang, F.-S.; Ko, J.-Y.; Wang, C.-J.; Wu, S.-L. Comparative serum proteome expression of osteonecrosis of the femoral head in adults. *Bone* 2008, 43, 561–6.
25. Bosco, G.; Vezzani, G.; Mrakic Sposta, S.; Rizzato, A.; Enten, G.; Abou-Samra, A.; Malacrida, S.; Quartesan, S.; Vezzoli, A.; Camporesi, E. Hyperbaric oxygen therapy ameliorates osteonecrosis in patients by modulating inflammation and oxidative stress. *J. Enzyme Inhib. Med. Chem.* 2018, 33, 1501–1505.

26. Whyte, M.P.; Wenkert, D.; McAlister, W.H.; Mughal, M.Z.; Freemont, A.J.; Whitehouse, R.; Baildam, E.M.; Coburn, S.P.; Ryan, L.M.; Mumm, S. Chronic recurrent multifocal osteomyelitis mimicked in childhood hypophosphatasia. *J. Bone Miner. Res.* 2009, *24*, 1493–1505.
27. Mentrup, B.; Marschall, C.; Barvencik, F.; Amling, M.; Plendl, H.; Jakob, F.; Beck, C. Functional characterization of a novel mutation localized in the start codon of the tissue-nonspecific alkaline phosphatase gene. *Bone* 2011, *48*, 1401–1408.
28. Berger, C.E.; Kroner, A.H.; Minai-Pour, M.B.; Ogris, E.; Engel, A. Biochemical markers of bone metabolism in bone marrow edema syndrome of the hip. *Bone* 2003, *33*, 346–351.
29. Horas, K.; Fraissler, L.; Maier, G.; Jakob, F.; Seefried, L.; Konrads, C.; Rudert, M.; Walcher, M. High Prevalence of Vitamin D Deficiency in Patients With Bone Marrow Edema Syndrome of the Foot and Ankle. *Foot ankle Int.* 2017, *38*, 760–766.
30. Berger, C.E.; Kroner, A.; Stiegler, H.; Erdel, M.; Haas, O.A.; Engel, A. Hypofibrinolysis, lipoprotein(a), and plasminogen activator inhibitor. *Clin. Orthop. Relat. Res.* 2002, 342–349.
31. Berger, C.E.; Kluger, R.; Urban, M.; Kowalski, J.; Haas, O.A.; Engel, A. Elevated levels of lipoprotein(a) in familial bone marrow edema syndrome of the hip. *Clin. Orthop. Relat. Res.* 2000, 126–131.
32. Rodriguez, S.; Paniagua, O.; Nugent, K.M.; Phy, M.P. Regional transient osteoporosis of the foot and vitamin C deficiency. *Clin. Rheumatol.* 2007, *26*, 976–978.
33. Ota, S.; Chiba, D.; Sasaki, E.; Kumagai, G.; Yamamoto, Y.; Nakaji, S.; Tsuda, E.; Ishibashi, Y. Symptomatic bone marrow lesions induced by reduced bone mineral density in middle-aged women: a cross-sectional Japanese population study. *Arthritis Res. Ther.* 2019, *21*, 113.
34. Anagnostakos, K.; Orth, P. Role of serum lipoprotein at the site of iloprost therapy in the treatment of painful bone marrow edema. *Orthopedics* 2013, *36*, e1283-9.
35. Bui-Mansfield, L.T.; Moak, M. Magnetic resonance appearance of bone marrow edema associated with hydroxyapatite deposition disease without cortical erosion. *J. Comput. Assist. Tomogr.* 2005, *29*, 103–107.
